# Supplementary material for: Microwave-hydrothermal synthesis of W0.4Mo0.6O3 and carbon-decorated WOx-MoO2 nanorod anodes for lithium ion batteries
Source: Royal Society of Chemistry journal article supplement (doi:10.1039/c0jm04571c), 2011-01-01
Supplement: c0jm04571c.pdf [file c0jm04571c.pdf]

### Supplementary Information

## Microwave-hydrothermal Synthesis of $W_{0.4}Mo_{0.6}O_3$ and Carbon-decorated $WO_x-MoO_2$ Nanorod Anodes for Lithium Ion Batteries

Sukeun Yoon and Arumugam Manthiram\*

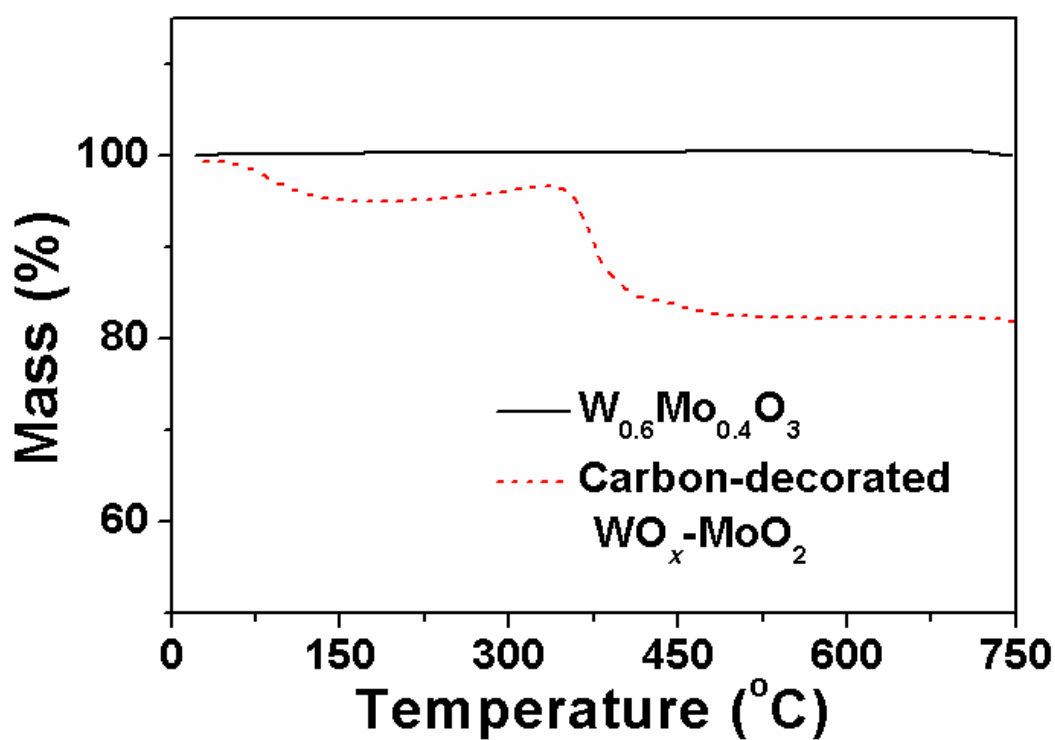

Fig. S1 TGA plots of  $W_{0.4}Mo_{0.6}O_3$  and carbon-decorated  $WO_x-MoO_2$  nanorod samples.

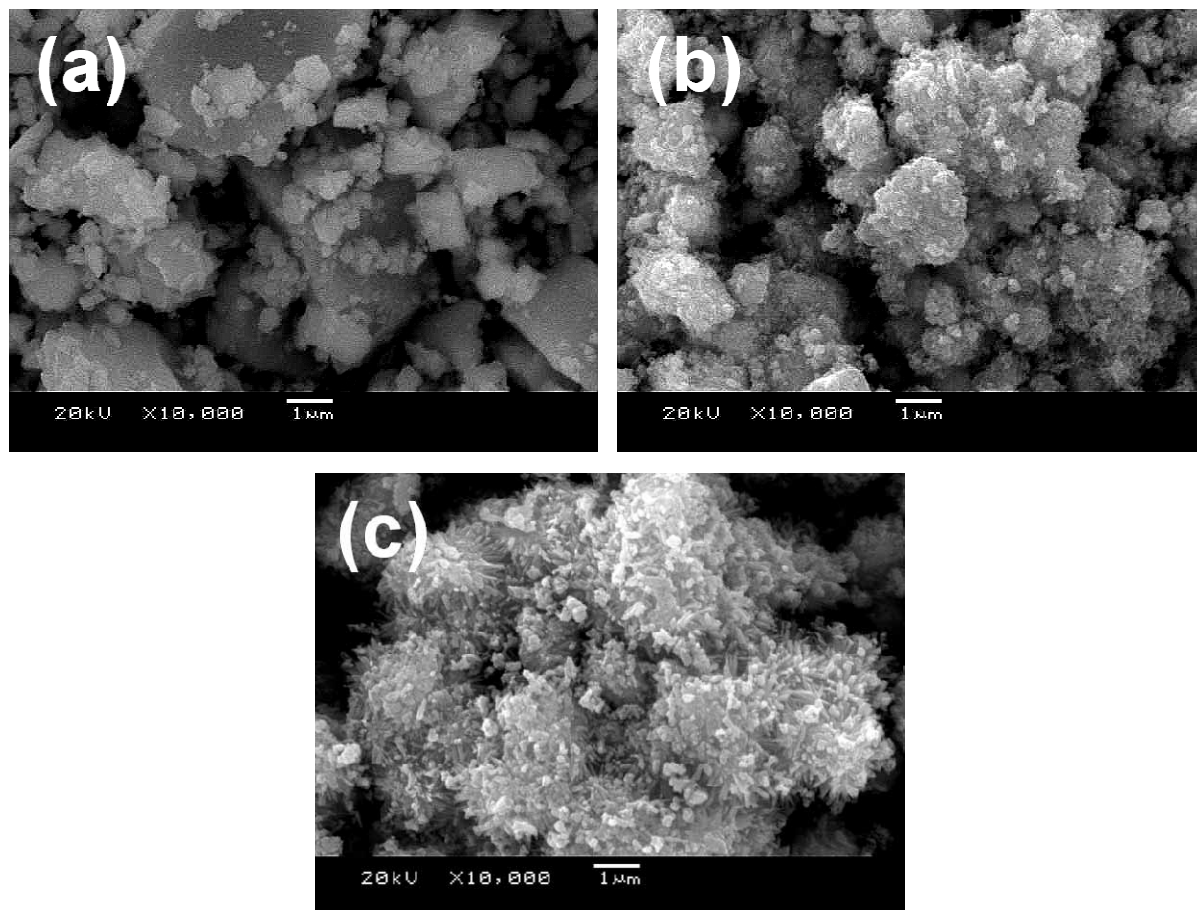

**Fig. S2** SEM images of the as-synthesized  $W_{0.4}Mo_{0.6}O_3$  formed at (a) pH = 2, (b) pH = 5, and (c) pH = 7.
